# Supplementary material
Source: PubMed Central journal article supplement (PMC7596753)
Supplement: ja0c08113_si_001.pdf [file ja0c08113_si_001.pdf]

## SUPPORTING INFORMATION

# Theoretical prediction and synthesis of a family of atomic laminate metal borides with in-plane chemical ordering

Martin Dahlgvist,\* Quanzheng Tao, Jie Zhou, Justinas Palisaitis, Per O.Å. Persson, Johanna Rosen\*

*Thin Film Physics, Department of Physics, Chemistry and Biology (IFM), Linköping University,  
SE-581 83 Linköping, Sweden*

\* corresponding authors: martin.dahlgvist@liu.se, johanna.rosen@liu.se

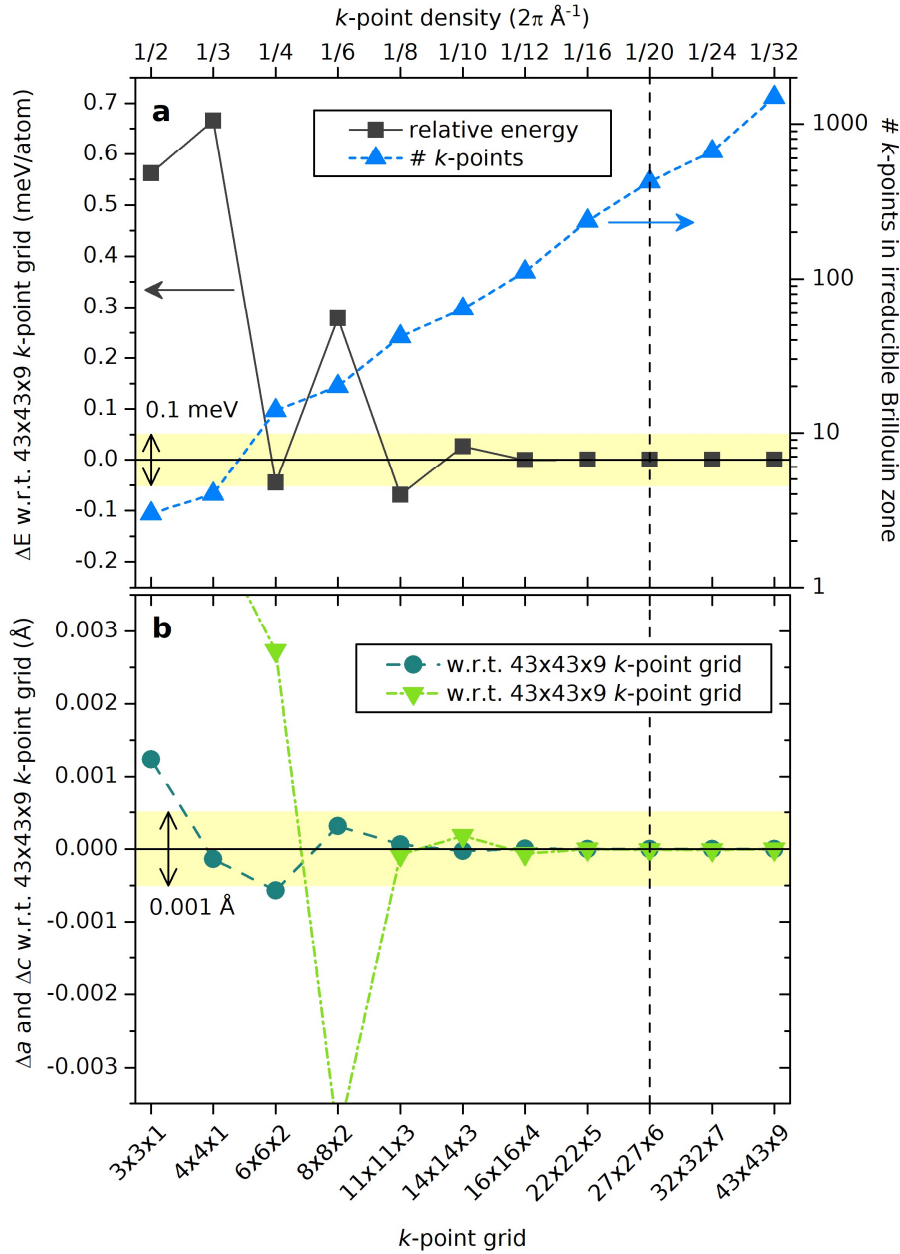

**Figure S1.** Convergence of relative (a) energy and (b) lattice parameters  $a$  and  $c$  for  $\text{Mo}_{4/3}\text{Y}_{2/3}\text{AlB}_2$  ( $R\bar{3}m$ ) as compared to largest  $k$ -point grid (43x43x9) considered as function of  $k$ -point grid. Dashed vertical line indicate the  $k$ -point density used in this work. Convergence with respect to  $k$ -point density used in this work is reached as indicated by the yellow area marked in (a) for an energy interval of 0.1 meV/atom and in (b) for a lattice parameter interval of 0.001 Å.

**Table S1.** Calculated formation enthalpy  $\Delta H_{\text{cp}}$  for  $M_2\text{AlB}_2$  with  $Cmmm$  and  $P\bar{6}m2$  symmetry (in meV/atom) along with identified equilibrium simplex. Experimentally known  $M_2\text{AlB}_2$  phases are marked in bold.

| $M$       | $\Delta H_{\text{cp}}[Cmmm]$<br>(meV/atom) | $\Delta H_{\text{cp}}[P\bar{6}m2]$<br>(meV/atom) | Equilibrium simplex                                                                  |
|-----------|--------------------------------------------|--------------------------------------------------|--------------------------------------------------------------------------------------|
| Sc        | 42                                         | 88                                               | ScB <sub>2</sub> , ScAl                                                              |
| Y         | 59                                         | 131                                              | YB <sub>2</sub> , Y <sub>2</sub> Al, YAl <sub>2</sub>                                |
| Ti        | 26                                         | 14                                               | TiAl, TiB <sub>2</sub>                                                               |
| Zr        | 73                                         | 63                                               | ZrB <sub>2</sub> , Zr <sub>2</sub> Al <sub>3</sub> , Zr <sub>4</sub> Al <sub>3</sub> |
| Hf        | 77                                         | 35                                               | HfB <sub>2</sub> , HfAl <sub>2</sub> , Hf <sub>4</sub> Al <sub>3</sub>               |
| V         | 102                                        | 73                                               | V <sub>5</sub> B <sub>6</sub> , VAl <sub>3</sub>                                     |
| Nb        | 143                                        | 56                                               | NbB, Nb <sub>3</sub> B <sub>4</sub> , NbAl <sub>3</sub>                              |
| Ta        | 190                                        | 75                                               | TaB, Ta <sub>3</sub> B <sub>4</sub> , TaAl <sub>3</sub>                              |
| <b>Cr</b> | <b>-13</b>                                 | 118                                              | CrAlB, Cr <sub>4</sub> AlB <sub>4</sub>                                              |
| Mo        | 18                                         | 98                                               | MoAlB, Mo <sub>4</sub> AlB <sub>4</sub>                                              |
| W         | 52                                         | 143                                              | WAlB, WB                                                                             |
| <b>Mn</b> | <b>-67</b>                                 | 82                                               | MnB, MnB <sub>4</sub> , Mn <sub>4</sub> Al <sub>11</sub>                             |
| <b>Fe</b> | <b>-78</b>                                 | 4                                                | FeAlB, FeB                                                                           |
| Co        | 55                                         | 120                                              | CoB, B, CoAl                                                                         |

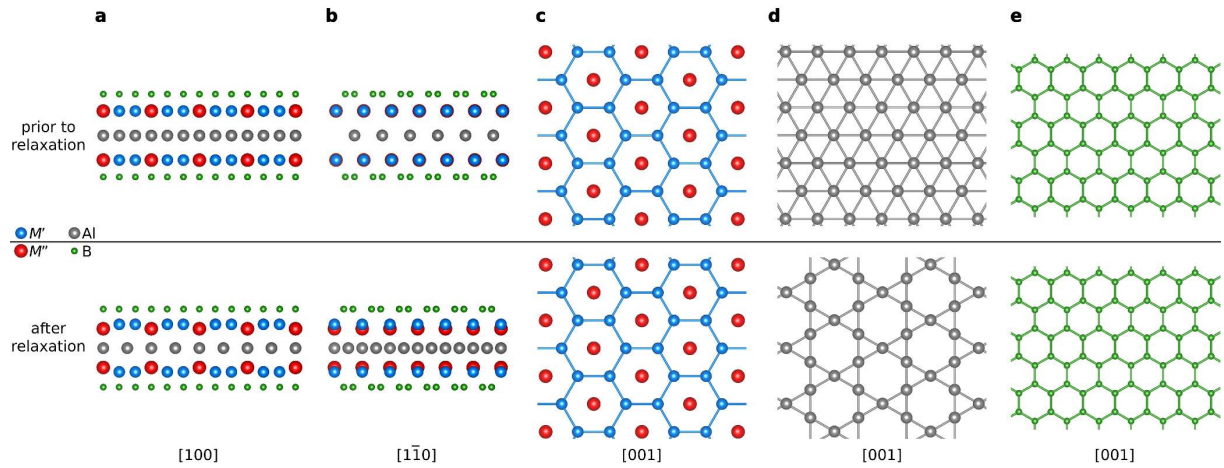

**Figure S2.** Schematic comparison of the crystal structure of  $M'_{4/3}M''_{2/3}\text{AlB}_2$  assuming in-plane ordered  $P\bar{6}2m/P\bar{6}2c/R\bar{3}m/C2$  symmetry, prior to (upper part) and after (lower part) relaxation. A B-M-Al-M-B section shown along (a)  $[100]$  and (b)  $[1\bar{1}0]$  zone axis. Top view of (c) M-layer, (d) Al-layer, and (e) boron layer along  $[001]$  zone axis.

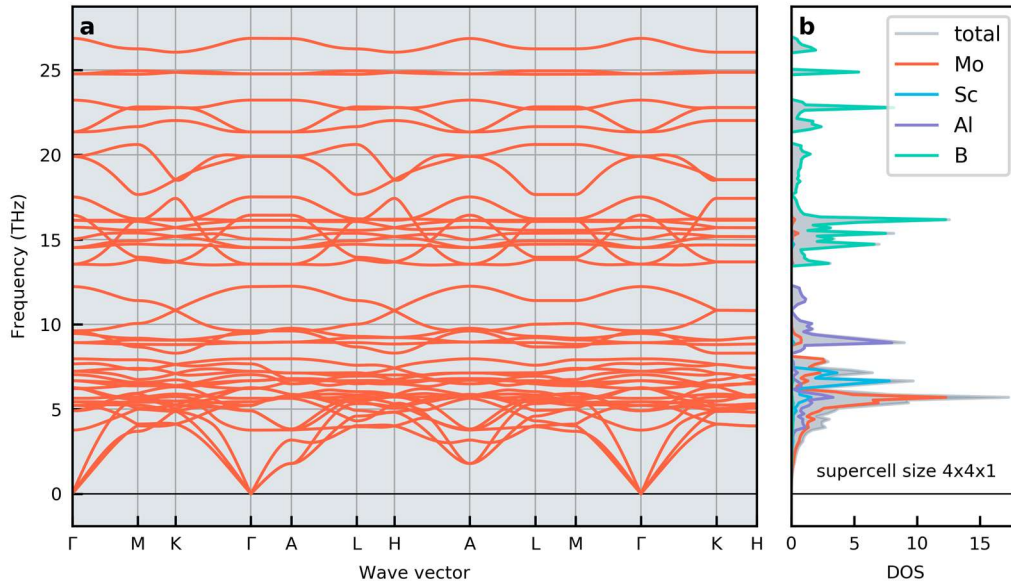

**Figure S3.** Phonon dispersion and phonon DOS for  $\text{Mo}_{4/3}\text{Sc}_{2/3}\text{AlB}_2$  with  $P\bar{6}2m$  symmetry (space group 189).

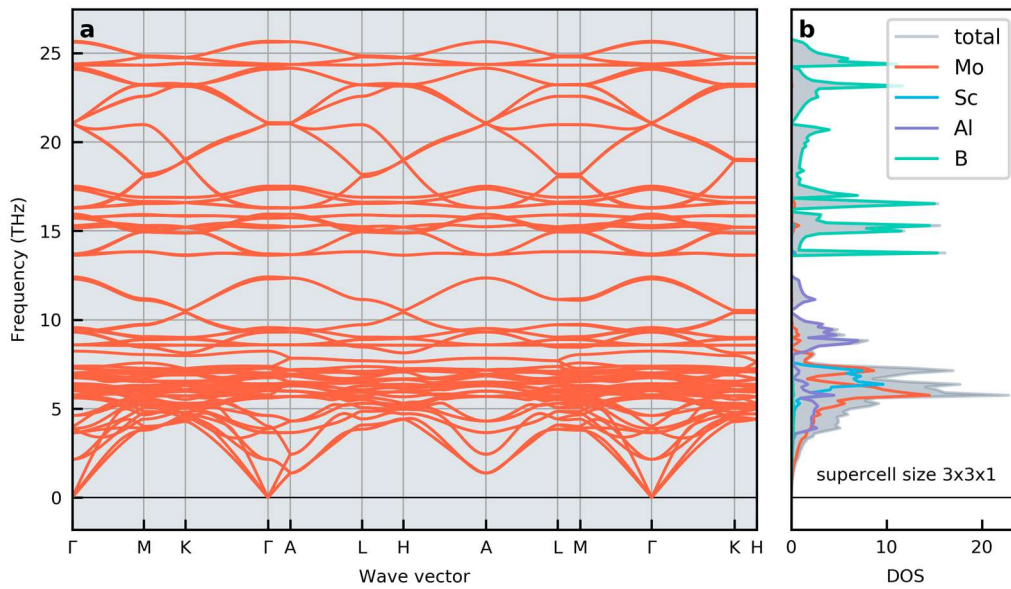

**Figure S4.** Phonon dispersion and phonon DOS for  $\text{Mo}_{4/3}\text{Sc}_{2/3}\text{AlB}_2$  with  $P\bar{6}2c$  symmetry (space group 190).

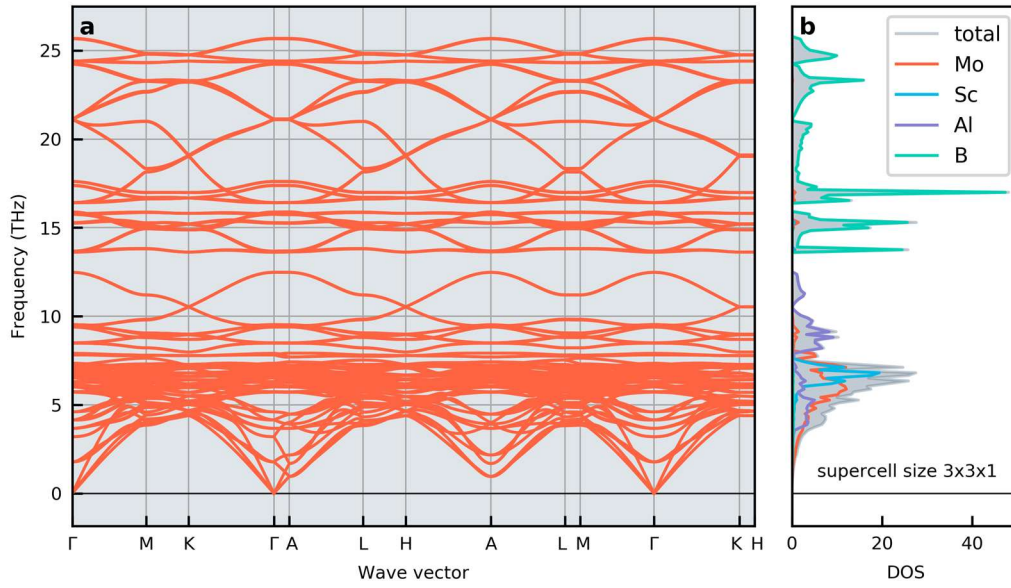

**Figure S5.** Phonon dispersion and phonon DOS for  $\text{Mo}_{4/3}\text{Sc}_{2/3}\text{AlB}_2$  with  $R\bar{3}m$  symmetry (space group 166).

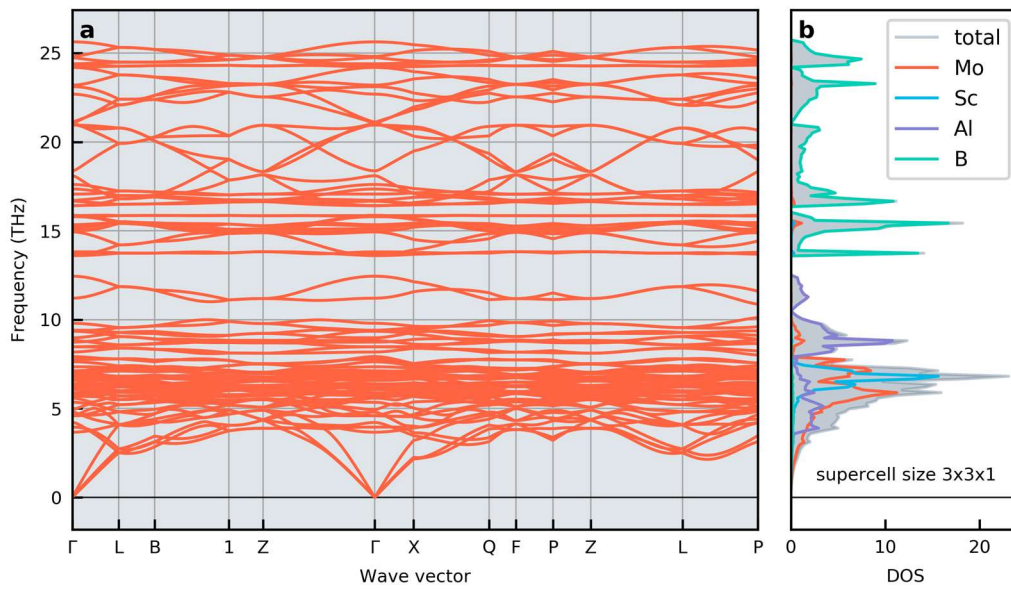

**Figure S6.** Phonon dispersion and phonon DOS for  $\text{Mo}_{4/3}\text{Sc}_{2/3}\text{AlB}_2$  with  $C2$  symmetry (space group 5).

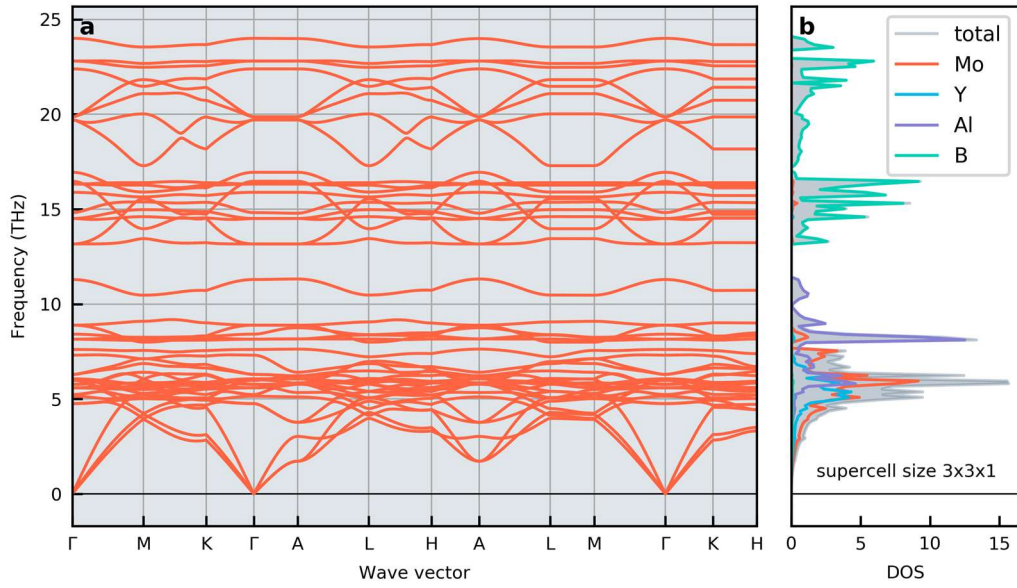

**Figure S7.** Phonon dispersion and phonon DOS for  $\text{Mo}_{4/3}\text{Y}_{2/3}\text{AlB}_2$  with  $P\bar{6}2m$  symmetry (space group 189).

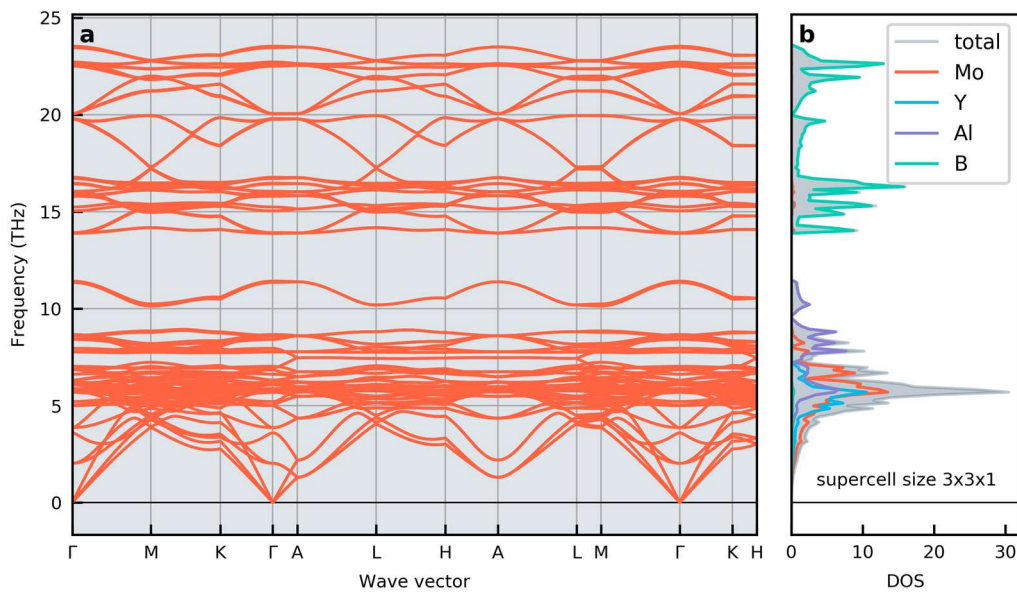

**Figure S8.** Phonon dispersion and phonon DOS for  $\text{Mo}_{4/3}\text{Y}_{2/3}\text{AlB}_2$  with  $P\bar{6}2c$  symmetry (space group 190).

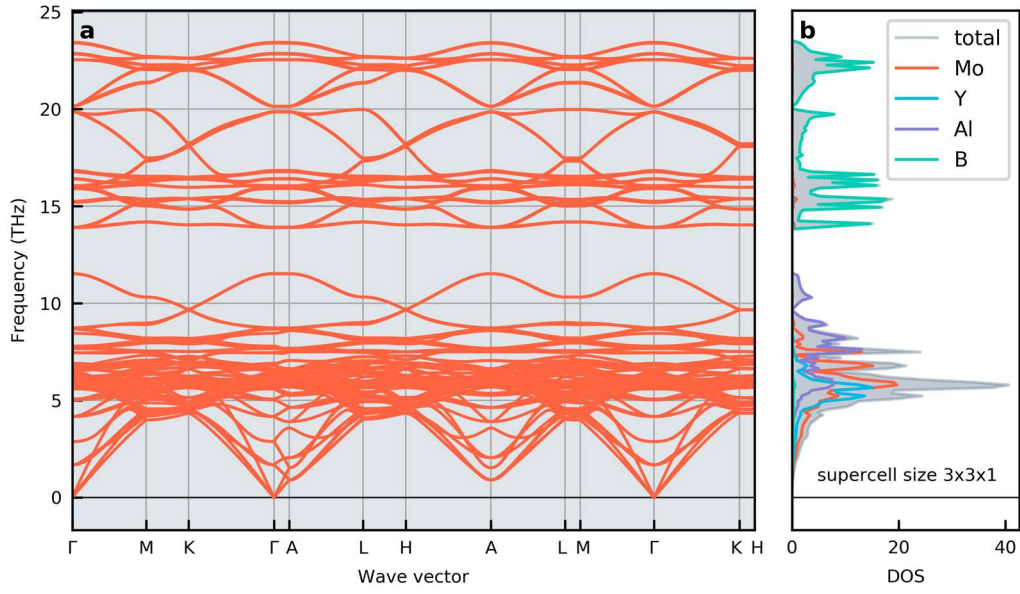

**Figure S9.** Phonon dispersion and phonon DOS for  $\text{Mo}_{4/3}\text{Y}_{2/3}\text{AlB}_2$  with  $R\bar{3}m$  symmetry (space group 166).

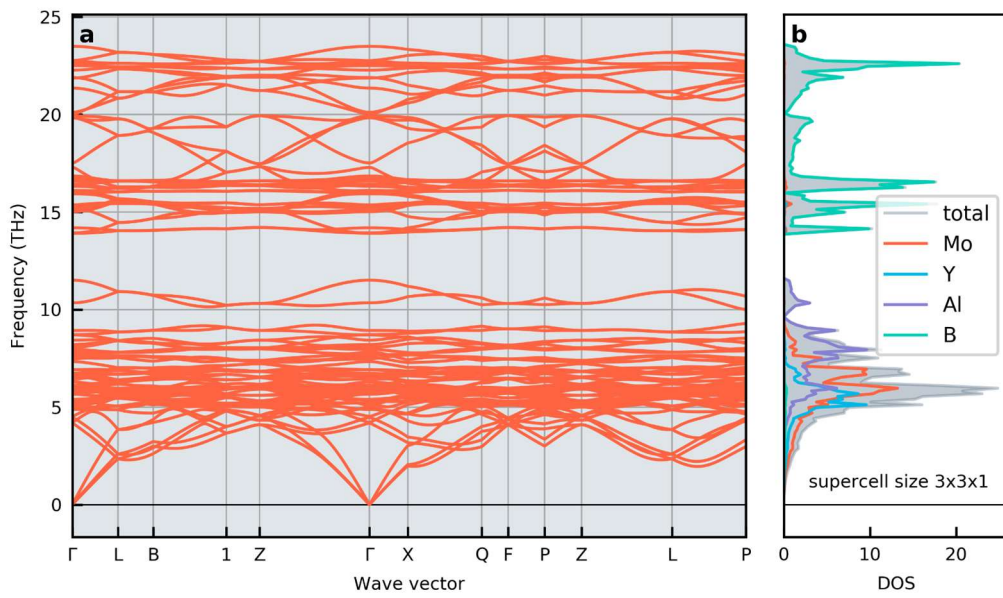

**Figure S20.** Phonon dispersion and phonon DOS for  $\text{Mo}_{4/3}\text{Y}_{2/3}\text{AlB}_2$  with  $C2$  symmetry (space group 5).

**Table S2.** Identified equilibrium simplex for  $M':M'':Al:B$  of a 4:2:3:6 composition.

| $M'$ | $M''$ | Equilibrium simplex                                                                                                    | $M'$ | $M''$ | Equilibrium simplex                                                                                                                 | $M'$ | $M''$ | Equilibrium simplex                                                                                                                 |
|------|-------|------------------------------------------------------------------------------------------------------------------------|------|-------|-------------------------------------------------------------------------------------------------------------------------------------|------|-------|-------------------------------------------------------------------------------------------------------------------------------------|
| Sc   | Y     | ScB <sub>2</sub> , YAl <sub>2</sub> , Y <sub>2</sub> Al, Sc <sub>2</sub> Al                                            | V    | Sc    | VB, ScAl <sub>3</sub> , ScB <sub>2</sub>                                                                                            | W    | Sc    | WB, ScAl <sub>3</sub> , ScB <sub>2</sub>                                                                                            |
| Sc   | Ti    | ScAl, TiB <sub>2</sub> , ScB <sub>2</sub>                                                                              | V    | Y     | YAl <sub>2</sub> , YB <sub>2</sub> , V <sub>3</sub> B <sub>4</sub> , V <sub>3</sub> B <sub>6</sub>                                  | W    | Y     | WB, YAl <sub>2</sub> , YB <sub>4</sub>                                                                                              |
| Sc   | Zr    | ScAl, ZrB <sub>2</sub> , ScB <sub>2</sub>                                                                              | V    | Ti    | VB, TiAl <sub>3</sub> , TiB <sub>2</sub>                                                                                            | W    | Ti    | TiB <sub>2</sub> , W <sub>2</sub> B, WB, WAl <sub>5</sub>                                                                           |
| Sc   | Hf    | ScAl, HfB <sub>2</sub> , ScB <sub>2</sub>                                                                              | V    | Zr    | VB, ZrAl <sub>3</sub> , ZrB <sub>2</sub>                                                                                            | W    | Zr    | ZrB <sub>2</sub> , W <sub>2</sub> B, WB, WAl <sub>5</sub>                                                                           |
| Sc   | V     | VB, ScB <sub>2</sub> , ScAl, ScAl <sub>2</sub>                                                                         | V    | Hf    | VB, HfAl <sub>3</sub> , HfB <sub>2</sub>                                                                                            | W    | Hf    | HfB <sub>2</sub> , W <sub>2</sub> B, WB, WAl <sub>5</sub>                                                                           |
| Sc   | Nb    | NbB, ScB <sub>2</sub> , ScAl, ScAl <sub>2</sub>                                                                        | V    | Nb    | NbAl <sub>3</sub> , V <sub>3</sub> B <sub>6</sub> , VB, Nb <sub>3</sub> B <sub>4</sub>                                              | W    | V     | WB, WAl <sub>5</sub> , V <sub>3</sub> B <sub>4</sub> , V <sub>3</sub> B <sub>6</sub>                                                |
| Sc   | Ta    | TaB, ScB <sub>2</sub> , ScAl, ScAl <sub>2</sub>                                                                        | V    | Ta    | TaB, TaAl <sub>3</sub> , V <sub>3</sub> B <sub>4</sub> , V <sub>3</sub> B <sub>6</sub>                                              | W    | Nb    | WB, WAlB, NbAl <sub>3</sub> , Nb <sub>2</sub> B <sub>3</sub>                                                                        |
| Sc   | Cr    | ScB <sub>2</sub> , ScAl <sub>2</sub> , Cr <sub>2</sub> B                                                               | V    | Cr    | Cr <sub>2</sub> AlB <sub>2</sub> , V <sub>3</sub> B <sub>6</sub> , VAl <sub>3</sub>                                                 | W    | Ta    | WAlB, TaB, WB                                                                                                                       |
| Sc   | Mo    | ScB <sub>2</sub> , ScAl <sub>2</sub> , Mo <sub>3</sub> Al, Mo <sub>3</sub> Al <sub>8</sub>                             | V    | Mo    | MoAlB, VB, V <sub>3</sub> B <sub>6</sub> , Mo <sub>3</sub> Al <sub>8</sub>                                                          | W    | Cr    | WB, WAlB, Cr <sub>2</sub> AlB <sub>2</sub>                                                                                          |
| Sc   | W     | ScB <sub>2</sub> , W, ScAl <sub>3</sub>                                                                                | V    | W     | WB, VB, WAl <sub>5</sub> , V <sub>3</sub> B <sub>6</sub>                                                                            | W    | Mo    | WB, MoAlB, WAlB                                                                                                                     |
| Sc   | Mn    | ScB <sub>2</sub> , ScAl <sub>2</sub> , Mn <sub>2</sub> B                                                               | V    | Mn    | V <sub>3</sub> B <sub>6</sub> , Mn <sub>2</sub> AlB <sub>2</sub> , Mn <sub>4</sub> Al <sub>11</sub> , V <sub>3</sub> B <sub>4</sub> | W    | Mn    | WB, WAlB, Mn <sub>2</sub> AlB <sub>2</sub>                                                                                          |
| Sc   | Fe    | ScB <sub>2</sub> , FeAl, ScAl                                                                                          | V    | Fe    | V <sub>2</sub> B <sub>3</sub> , V <sub>3</sub> B <sub>4</sub> , Fe <sub>5</sub> Al <sub>8</sub> , Fe <sub>2</sub> AlB <sub>2</sub>  | W    | Fe    | WAlB, WB, Fe <sub>2</sub> AlB <sub>2</sub>                                                                                          |
| Sc   | Co    | ScB <sub>2</sub> , CoAl, ScAl                                                                                          | V    | Co    | V <sub>2</sub> B <sub>3</sub> , CoAl, Co <sub>2</sub> Al <sub>5</sub>                                                               | W    | Co    | WB <sub>2</sub> , WB, CoAl, Co <sub>2</sub> Al <sub>5</sub>                                                                         |
| Y    | Sc    | ScB <sub>2</sub> , YB <sub>2</sub> , Y <sub>2</sub> Al, YAl <sub>2</sub>                                               | Nb   | Sc    | NbB, ScAl <sub>3</sub> , ScB <sub>2</sub>                                                                                           | Mn   | Sc    | MnAl, ScB <sub>2</sub> , Mn <sub>2</sub> AlB <sub>2</sub>                                                                           |
| Y    | Ti    | TiB <sub>2</sub> , YB <sub>2</sub> , Y <sub>2</sub> Al, YAl <sub>2</sub>                                               | Nb   | Y     | YAl <sub>2</sub> , NbB, Nb <sub>3</sub> B <sub>4</sub> , YB <sub>2</sub>                                                            | Mn   | Y     | MnB, YAl <sub>2</sub> , YB <sub>4</sub>                                                                                             |
| Y    | Zr    | ZrB <sub>2</sub> , YB <sub>2</sub> , Y <sub>2</sub> Al, YAl <sub>2</sub>                                               | Nb   | Ti    | NbB, TiB <sub>2</sub> , NbAl <sub>3</sub> , Nb <sub>2</sub> Al                                                                      | Mn   | Ti    | MnAl, TiB <sub>2</sub> , Mn <sub>2</sub> AlB <sub>2</sub>                                                                           |
| Y    | Hf    | HfB <sub>2</sub> , YB <sub>2</sub> , Y <sub>2</sub> Al, YAl <sub>2</sub>                                               | Nb   | Zr    | NbB, ZrB <sub>2</sub> , ZrAl <sub>2</sub> , NbAl <sub>3</sub>                                                                       | Mn   | Zr    | MnAl, ZrB <sub>2</sub> , Mn <sub>2</sub> AlB <sub>2</sub>                                                                           |
| Y    | V     | YB <sub>2</sub> , VB, YAl <sub>2</sub> , Y <sub>2</sub> Al                                                             | Nb   | Hf    | HfB <sub>2</sub> , NbB, WAl <sub>5</sub> , V <sub>3</sub> B <sub>6</sub>                                                            | Mn   | Hf    | MnAl, HfB <sub>2</sub> , Mn <sub>2</sub> AlB <sub>2</sub>                                                                           |
| Y    | Nb    | YB <sub>2</sub> , NbB, YAl <sub>2</sub> , Y <sub>2</sub> Al                                                            | Nb   | V     | VB, NbAl <sub>3</sub> , Nb <sub>3</sub> B <sub>4</sub>                                                                              | Mn   | V     | Mn <sub>2</sub> AlB <sub>2</sub> , V <sub>3</sub> B <sub>6</sub> , V <sub>3</sub> B <sub>4</sub> , Mn <sub>4</sub> Al <sub>11</sub> |
| Y    | Ta    | TaB, YB <sub>2</sub> , YAl <sub>2</sub> , Y <sub>2</sub> Al                                                            | Nb   | Ta    | TaB, NbAl <sub>3</sub> , Nb <sub>3</sub> B <sub>4</sub>                                                                             | Mn   | Nb    | Mn <sub>2</sub> AlB <sub>2</sub> , NbB, NbAl <sub>3</sub> , Nb <sub>3</sub> B <sub>4</sub>                                          |
| Y    | Cr    | YB <sub>2</sub> , CrB, YAl <sub>2</sub> , Y <sub>2</sub> Al                                                            | Nb   | Cr    | CrB, Nb <sub>3</sub> B <sub>4</sub> , NbAl <sub>3</sub>                                                                             | Mn   | Ta    | Mn <sub>2</sub> AlB <sub>2</sub> , TaB, Ta <sub>3</sub> B <sub>4</sub> , Mn <sub>4</sub> Al <sub>11</sub>                           |
| Y    | Mo    | MoB, YB <sub>2</sub> , YAl <sub>2</sub> , Y <sub>2</sub> Al                                                            | Nb   | Mo    | Nb <sub>3</sub> B <sub>4</sub> , MoB, NbB, Mo <sub>3</sub> Al <sub>8</sub>                                                          | Mn   | Cr    | Mn <sub>2</sub> AlB <sub>2</sub> , Cr <sub>2</sub> AlB <sub>2</sub>                                                                 |
| Y    | W     | YB <sub>2</sub> , YAl <sub>2</sub> , W <sub>2</sub> B                                                                  | Nb   | W     | WB, Nb <sub>3</sub> B <sub>4</sub> , NbAl <sub>3</sub>                                                                              | Mn   | Mo    | Mn <sub>2</sub> AlB <sub>2</sub> , MoAlB, MoB                                                                                       |
| Y    | Mn    | YB <sub>2</sub> , YAl <sub>2</sub> , Mn <sub>2</sub> B                                                                 | Nb   | Mn    | NbB, Mn <sub>2</sub> AlB <sub>2</sub> , NbAl <sub>3</sub> , Nb <sub>3</sub> B <sub>4</sub>                                          | Mn   | W     | Mn <sub>2</sub> AlB <sub>2</sub> , WAlB, WB                                                                                         |
| Y    | Fe    | YB <sub>2</sub> , YAl <sub>2</sub> , Fe <sub>2</sub> B                                                                 | Nb   | Fe    | FeAl, Nb <sub>2</sub> B <sub>3</sub> , NbB <sub>2</sub> , NbAl <sub>3</sub>                                                         | Mn   | Fe    | Mn <sub>2</sub> AlB <sub>2</sub> , Fe <sub>2</sub> AlB <sub>2</sub>                                                                 |
| Y    | Co    | YB <sub>2</sub> , CoAl, Y <sub>2</sub> Al, YAl <sub>2</sub>                                                            | Nb   | Co    | Nb <sub>2</sub> B <sub>3</sub> , CoAl, Co <sub>2</sub> Al <sub>5</sub>                                                              | Mn   | Co    | CoAl, MnB, Mn <sub>2</sub> AlB <sub>2</sub> , MnB <sub>4</sub>                                                                      |
| Ti   | Sc    | TiB <sub>2</sub> , ScAl, TiAl                                                                                          | Ta   | Sc    | TaB, ScB <sub>2</sub> , ScAl <sub>3</sub>                                                                                           | Fe   | Sc    | FeAl, ScB <sub>2</sub> , Fe <sub>2</sub> AlB <sub>2</sub>                                                                           |
| Ti   | Y     | YAl <sub>2</sub> , TiB <sub>2</sub> , Ti <sub>3</sub> B <sub>4</sub> , Y <sub>2</sub> Al                               | Ta   | Y     | TaB, YAl <sub>2</sub> , YB <sub>4</sub>                                                                                             | Fe   | Y     | Fe <sub>2</sub> B, FeAl, YB <sub>4</sub> , YAl <sub>2</sub>                                                                         |
| Ti   | Zr    | TiB <sub>2</sub> , Ti <sub>3</sub> B <sub>4</sub> , Zr <sub>2</sub> Al <sub>3</sub>                                    | Ta   | Ti    | TaB, TiB <sub>2</sub> , TiAl <sub>3</sub>                                                                                           | Fe   | Ti    | TiB <sub>2</sub> , Fe <sub>2</sub> AlB <sub>2</sub> , Fe <sub>3</sub> Al, Fe <sub>5</sub> Al <sub>8</sub>                           |
| Ti   | Hf    | TiB <sub>2</sub> , TiAl, Hf <sub>4</sub> Al <sub>3</sub> , HfAl <sub>2</sub>                                           | Ta   | Zr    | TaB, ZrB <sub>2</sub> , ZrAl <sub>3</sub>                                                                                           | Fe   | Zr    | FeAl, ZrB <sub>2</sub> , Fe <sub>2</sub> AlB <sub>2</sub>                                                                           |
| Ti   | V     | TiB <sub>2</sub> , VB, TiAl, TiAl <sub>2</sub>                                                                         | Ta   | Hf    | TaB, HfB <sub>2</sub> , HfAl <sub>3</sub>                                                                                           | Fe   | Hf    | FeAl, HfB <sub>2</sub> , Fe <sub>2</sub> AlB <sub>2</sub>                                                                           |
| Ti   | Nb    | TiB <sub>2</sub> , TiAl, Nb <sub>2</sub> Al, NbAl <sub>3</sub>                                                         | Ta   | V     | TaB, TaAl <sub>3</sub> , V <sub>2</sub> B <sub>3</sub>                                                                              | Fe   | V     | Fe <sub>2</sub> AlB <sub>2</sub> , V <sub>2</sub> B <sub>3</sub> , V <sub>3</sub> B <sub>4</sub> , Fe <sub>5</sub> Al <sub>8</sub>  |
| Ti   | Ta    | TiB <sub>2</sub> , TaB, TiAl, TiAl <sub>2</sub>                                                                        | Ta   | Nb    | TaB, NbAl <sub>3</sub> , Nb <sub>2</sub> B <sub>3</sub> , Ta <sub>3</sub> B <sub>4</sub>                                            | Fe   | Nb    | FeAl, NbB <sub>2</sub> , Fe <sub>2</sub> AlB <sub>2</sub>                                                                           |
| Ti   | Cr    | TiB <sub>2</sub> , TiAl <sub>2</sub> , Cr <sub>2</sub> Al                                                              | Ta   | Cr    | TaB, Cr <sub>2</sub> AlB <sub>2</sub> , Ta <sub>3</sub> B <sub>4</sub> , TaAl <sub>3</sub>                                          | Fe   | Ta    | Fe <sub>2</sub> AlB <sub>2</sub> , Ta <sub>3</sub> B <sub>4</sub> , TaB <sub>2</sub> , Fe <sub>5</sub> Al <sub>8</sub>              |
| Ti   | Mo    | TiB <sub>2</sub> , TiAl <sub>2</sub> , Mo <sub>3</sub> Al, Mo <sub>3</sub> Al <sub>8</sub>                             | Ta   | Mo    | TaB, MoAlB, Ta <sub>3</sub> B <sub>4</sub> , Mo <sub>3</sub> Al <sub>8</sub>                                                        | Fe   | Cr    | Fe <sub>2</sub> AlB <sub>2</sub> , Cr <sub>2</sub> AlB <sub>2</sub>                                                                 |
| Ti   | W     | TiB <sub>2</sub> , W, TiAl <sub>3</sub>                                                                                | Ta   | W     | TaB, WAlB, WAl <sub>5</sub> , Ta <sub>3</sub> B <sub>4</sub>                                                                        | Fe   | Mo    | Fe <sub>2</sub> AlB <sub>2</sub> , MoAlB, MoB                                                                                       |
| Ti   | Mn    | TiB <sub>2</sub> , MnAl, TiAl <sub>2</sub> , TiMn <sub>2</sub>                                                         | Ta   | Mn    | TaB, Ta <sub>3</sub> B <sub>4</sub> , Mn <sub>2</sub> AlB <sub>2</sub> , Mn <sub>4</sub> Al <sub>11</sub>                           | Fe   | W     | Fe <sub>2</sub> AlB <sub>2</sub> , WAlB, WB                                                                                         |
| Ti   | Fe    | TiB <sub>2</sub> , TiFe <sub>2</sub> Al, TiAl <sub>3</sub> , Fe <sub>5</sub> Al <sub>8</sub>                           | Ta   | Fe    | Ta <sub>3</sub> B <sub>4</sub> , TaB <sub>2</sub> , Fe <sub>5</sub> Al <sub>8</sub> , Fe <sub>2</sub> AlB <sub>2</sub>              | Fe   | Mn    | Fe <sub>2</sub> AlB <sub>2</sub> , Mn <sub>2</sub> AlB <sub>2</sub>                                                                 |
| Ti   | Co    | TiB <sub>2</sub> , CoAl, TiAl <sub>2</sub> , TiCo <sub>2</sub> Al                                                      | Ta   | Co    | CoAl, TaB <sub>2</sub> , Ta <sub>3</sub> B <sub>4</sub> , Co <sub>2</sub> Al <sub>5</sub>                                           | Fe   | Co    | Fe <sub>2</sub> AlB <sub>2</sub> , CoAl, CoB, B                                                                                     |
| Zr   | Sc    | ZrB <sub>2</sub> , ScAl, Zr <sub>4</sub> Al <sub>3</sub> , Zr <sub>2</sub> Al <sub>3</sub>                             | Cr   | Sc    | CrB, ScAl <sub>3</sub> , ScB <sub>2</sub>                                                                                           | Co   | Sc    | CoAl, ScB <sub>2</sub> , CoB, ScB <sub>12</sub>                                                                                     |
| Zr   | Y     | ZrB <sub>2</sub> , YAl <sub>2</sub> , Y <sub>2</sub> Al, Zr <sub>4</sub> Al <sub>3</sub>                               | Cr   | Y     | CrB, YAl <sub>2</sub> , YB <sub>4</sub>                                                                                             | Co   | Y     | CoAl, YB <sub>2</sub> , CoB, YB <sub>4</sub>                                                                                        |
| Zr   | Ti    | TiB <sub>2</sub> , ZrB <sub>2</sub> , Zr <sub>4</sub> Al <sub>3</sub> , Zr <sub>2</sub> Al <sub>3</sub>                | Cr   | Ti    | TiB <sub>2</sub> , Cr <sub>2</sub> AlB <sub>2</sub> , Cr <sub>2</sub> Al, TiAl <sub>3</sub>                                         | Co   | Ti    | CoAl, TiB <sub>2</sub> , CoB, B                                                                                                     |
| Zr   | Hf    | HfB <sub>2</sub> , ZrB <sub>2</sub> , Zr <sub>4</sub> Al <sub>3</sub> , Zr <sub>2</sub> Al <sub>3</sub>                | Cr   | Zr    | CrB, ZrAl <sub>3</sub> , ZrB <sub>2</sub>                                                                                           | Co   | Zr    | CoAl, ZrB <sub>2</sub> , CoB, B                                                                                                     |
| Zr   | V     | ZrB <sub>2</sub> , VB, Zr <sub>2</sub> Al <sub>3</sub>                                                                 | Cr   | Hf    | HfB <sub>2</sub> , Cr <sub>2</sub> AlB <sub>2</sub> , Cr <sub>2</sub> Al, HfAl <sub>3</sub>                                         | Co   | Hf    | CoAl, HfB <sub>2</sub> , CoB, B                                                                                                     |
| Zr   | Nb    | ZrB <sub>2</sub> , NbB, Zr <sub>2</sub> Al <sub>3</sub>                                                                | Cr   | V     | Cr <sub>2</sub> AlB <sub>2</sub> , VAl <sub>3</sub> , V <sub>3</sub> B <sub>6</sub>                                                 | Co   | V     | CoAl, VB <sub>2</sub> , VCoB <sub>3</sub> , B                                                                                       |
| Zr   | Ta    | ZrB <sub>2</sub> , TaB, Zr <sub>2</sub> Al <sub>3</sub>                                                                | Cr   | Nb    | Cr <sub>2</sub> AlB <sub>2</sub> , CrB, Nb <sub>3</sub> B <sub>4</sub> , NbAl <sub>3</sub>                                          | Co   | Nb    | CoAl, NbB <sub>2</sub> , CoB, B                                                                                                     |
| Zr   | Cr    | ZrB <sub>2</sub> , ZrAl <sub>2</sub> , Cr <sub>2</sub> B                                                               | Cr   | Ta    | Cr <sub>2</sub> AlB <sub>2</sub> , TaB, Ta <sub>3</sub> B <sub>4</sub> , TaAl <sub>3</sub>                                          | Co   | Ta    | CoAl, TaB <sub>2</sub> , CoB, B                                                                                                     |
| Zr   | Mo    | ZrB <sub>2</sub> , ZrAl <sub>2</sub> , Mo <sub>3</sub> Al, Mo <sub>3</sub> Al <sub>8</sub>                             | Cr   | Mo    | MoAlB, CrB, Cr <sub>2</sub> AlB <sub>2</sub>                                                                                        | Co   | Cr    | CoAl, CrB <sub>2</sub> , CoB, CrB <sub>4</sub>                                                                                      |
| Zr   | W     | ZrB <sub>2</sub> , W, ZrAl <sub>3</sub>                                                                                | Cr   | W     | Cr <sub>2</sub> AlB <sub>2</sub> , WB, WAlB                                                                                         | Co   | Mo    | CoAl, MoB <sub>2</sub> , CoB, B                                                                                                     |
| Zr   | Mn    | ZrB <sub>2</sub> , ZrAl <sub>2</sub> , Mn <sub>7</sub> Al <sub>3</sub> , MnAl                                          | Cr   | Mn    | Cr <sub>2</sub> AlB <sub>2</sub> , Mn <sub>2</sub> AlB <sub>2</sub>                                                                 | Co   | W     | CoAl, CoB, WB <sub>4</sub>                                                                                                          |
| Zr   | Fe    | ZrB <sub>2</sub> , ZrAl <sub>2</sub> , Fe <sub>3</sub> Al, FeAl                                                        | Cr   | Fe    | Cr <sub>2</sub> AlB <sub>2</sub> , Fe <sub>2</sub> AlB <sub>2</sub>                                                                 | Co   | Mn    | CoAl, CoB, MnB, MnB <sub>4</sub>                                                                                                    |
| Zr   | Co    | ZrB <sub>2</sub> , CoAl, Zr <sub>4</sub> Al <sub>3</sub> , Zr <sub>2</sub> Al <sub>3</sub>                             | Cr   | Co    | CrB <sub>2</sub> , CrB, CoAl, Co <sub>2</sub> Al <sub>5</sub>                                                                       | Co   | Fe    | CoAl, CoB, B, Fe <sub>2</sub> AlB <sub>2</sub>                                                                                      |
| Hf   | Sc    | HfB <sub>2</sub> , ScAl, ScAl <sub>2</sub> , Hf <sub>4</sub> Al <sub>3</sub>                                           | Mo   | Sc    | MoB, ScB <sub>2</sub> , Mo <sub>3</sub> Al <sub>8</sub> , Mo <sub>3</sub> Al                                                        |      |       |                                                                                                                                     |
| Hf   | Y     | HfB <sub>2</sub> , YAl <sub>2</sub> , Y <sub>2</sub> Al, Hf <sub>4</sub> Al <sub>3</sub>                               | Mo   | Y     | MoB, YAl <sub>2</sub> , YB <sub>4</sub>                                                                                             |      |       |                                                                                                                                     |
| Hf   | Ti    | TiB <sub>2</sub> , HfB <sub>2</sub> , Hf <sub>4</sub> Al <sub>3</sub> , HfAl <sub>2</sub>                              | Mo   | Ti    | MoB, TiB <sub>2</sub> , Mo <sub>3</sub> Al <sub>8</sub> , Mo <sub>3</sub> Al                                                        |      |       |                                                                                                                                     |
| Hf   | Zr    | HfB <sub>2</sub> , Zr <sub>2</sub> Al <sub>3</sub> , Zr <sub>4</sub> Al <sub>3</sub> , Hf <sub>4</sub> Al <sub>3</sub> | Mo   | Zr    | ZrB <sub>2</sub> , MoB, Mo <sub>3</sub> Al <sub>8</sub> , Mo <sub>3</sub> Al                                                        |      |       |                                                                                                                                     |
| Hf   | V     | VB, HfB <sub>2</sub> , HfAl <sub>2</sub> , Hf <sub>4</sub> Al <sub>3</sub>                                             | Mo   | Hf    | HfB <sub>2</sub> , MoB, Mo <sub>3</sub> Al <sub>8</sub> , Mo <sub>3</sub> Al                                                        |      |       |                                                                                                                                     |
| Hf   | Nb    | HfB <sub>2</sub> , HfAl <sub>2</sub> , Nb <sub>2</sub> Al                                                              | Mo   | V     | MoAlB, VB, MoB                                                                                                                      |      |       |                                                                                                                                     |
| Hf   | Ta    | TaB, HfB <sub>2</sub> , HfAl <sub>2</sub> , Hf <sub>4</sub> Al <sub>3</sub>                                            | Mo   | Nb    | MoB, MoAlB, Nb <sub>3</sub> B <sub>4</sub> , Mo <sub>3</sub> Al <sub>8</sub>                                                        |      |       |                                                                                                                                     |
| Hf   | Cr    | HfB <sub>2</sub> , HfAl <sub>2</sub> , Cr <sub>2</sub> Al                                                              | Mo   | Ta    | MoAlB, TaB, Mo <sub>4</sub> AlB <sub>4</sub>                                                                                        |      |       |                                                                                                                                     |
| Hf   | Mo    | HfB <sub>2</sub> , HfAl <sub>2</sub> , Mo <sub>3</sub> Al, Mo <sub>3</sub> Al <sub>8</sub>                             | Mo   | Cr    | MoAlB, CrB, MoB                                                                                                                     |      |       |                                                                                                                                     |
| Hf   | W     | HfB <sub>2</sub> , W, HfAl <sub>3</sub>                                                                                | Mo   | W     | MoAlB, WB, MoB                                                                                                                      |      |       |                                                                                                                                     |
| Hf   | Mn    | HfB <sub>2</sub> , HfAl <sub>2</sub> , Mn <sub>7</sub> Al <sub>3</sub> , MnAl                                          | Mo   | Mn    | MoAlB, MoB, Mn <sub>2</sub> AlB <sub>2</sub>                                                                                        |      |       |                                                                                                                                     |
| Hf   | Fe    | HfB <sub>2</sub> , FeAl, Hf <sub>4</sub> Al <sub>3</sub> , HfAl <sub>2</sub>                                           | Mo   | Fe    | MoAlB, MoB, Fe <sub>2</sub> AlB <sub>2</sub>                                                                                        |      |       |                                                                                                                                     |
| Hf   | Co    | HfB <sub>2</sub> , CoAl, Hf <sub>4</sub> Al <sub>3</sub> , HfAl <sub>2</sub>                                           | Mo   | Co    | CoAl, MoB <sub>2</sub> , MoB, MoAlB                                                                                                 |      |       |                                                                                                                                     |



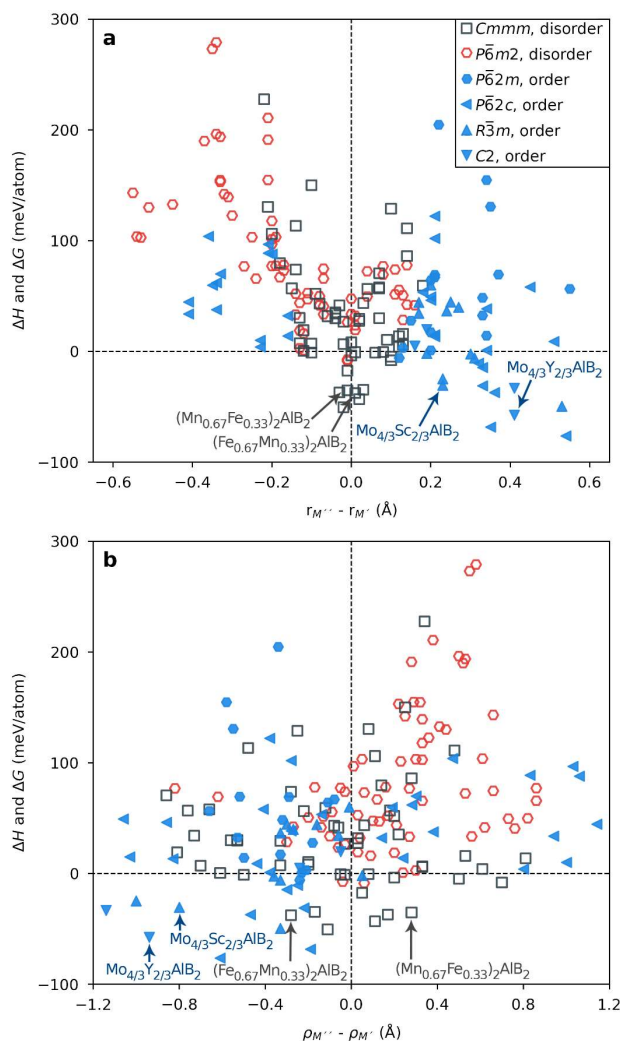

**Figure S11.**  $\Delta H$  or  $\Delta G$ , from Fig. 3b, as function of (a) size and (b) electronegativity difference between  $M''$  and  $M'$ . Symbols represent crystal structure and chemical order of lowest energy for a given combination of  $M'$  and  $M''$ ;  $Cmmm$  with disorder (open squares),  $P\bar{6}m2$  with disorder (open hexagon), and in-plane ordered  $i$ -MAB phases with  $P\bar{6}2m$  (filled hexagon),  $P\bar{6}2c$  (filled left triangle),  $R\bar{3}m$  (filled up triangle) and  $C2$  (filled down triangle) symmetries. Experimentally reported phases are marked in both panels.

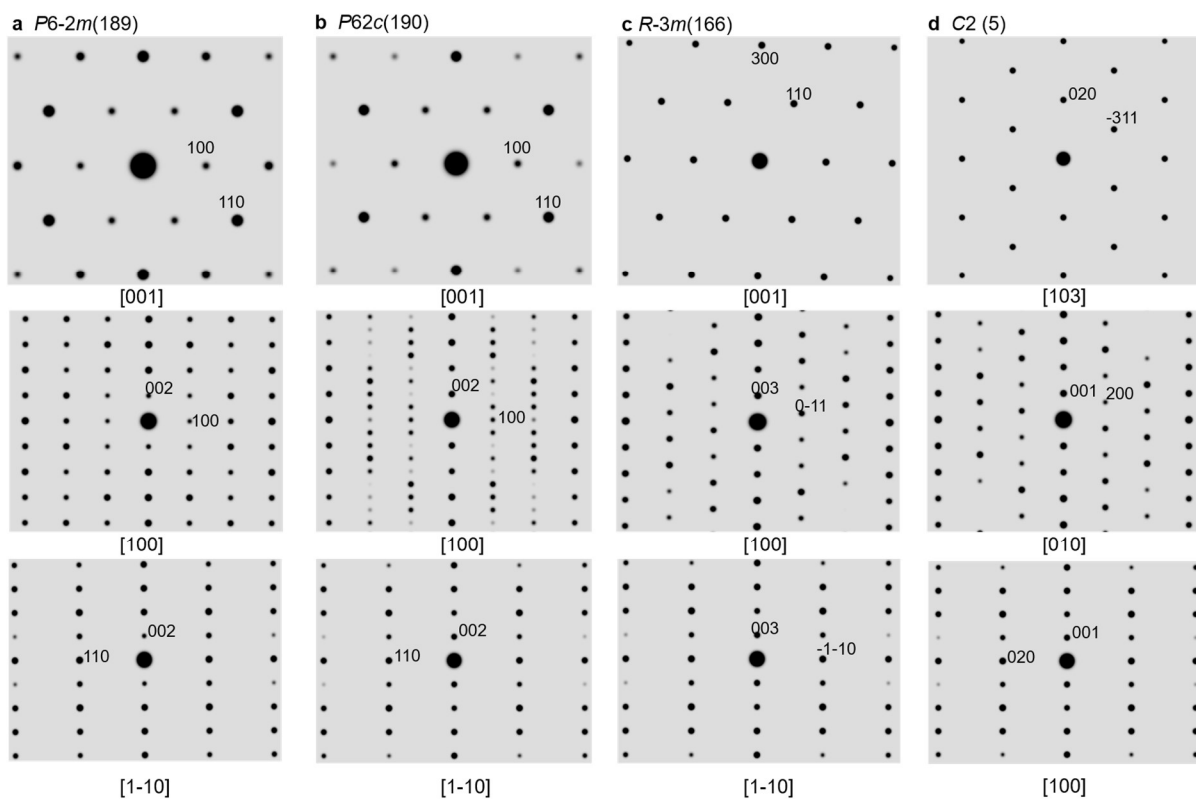

**Figure S12.** Simulated selective area electron diffraction patterns along  $[001]$ ,  $[100]$ , and  $[1\bar{1}0]$  zone axes for different *i*-MAB polymorphs with (a)  $P\bar{6}2m$ , (b)  $P\bar{6}2c$ , (c)  $R\bar{3}m$  and (d)  $C2$  symmetries.

**Table S3.** Rietveld refinement of  $\text{Mo}_{4/3}\text{Y}_{2/3}\text{AlB}_2$  assuming a hexagonal  $R\bar{3}m$  (#166) symmetry. From the Rietveld refinement of the XRD pattern shown in Fig. 4a, the mass fractions of the *i*-MAB phase  $\text{Mo}_{4/3}\text{Y}_{2/3}\text{AlB}_2$ , MoB and  $\text{Y}_2\text{O}_3$  were: 80, 15 and 5 wt%, respectively. The total  $\chi^2$  value was 3.23.

| Formula (unit cell)  | $\text{Mo}_{12}\text{Y}_6\text{Al}_9\text{B}_{18}$ |
|----------------------|----------------------------------------------------|
| Space group          | $R\bar{3}m$ (#166)                                 |
| $a = b$ (Å)          | 5.44577(9)                                         |
| $c$ (Å)              | 22.69048(38)                                       |
| $\alpha = \beta$ (°) | 90                                                 |
| $\gamma$ (°)         | 120                                                |
| Mo                   | 6c (0.00000, 0.00000, 0.56468(15))                 |
| Mo                   | 6c (0.00000, 0.00000, 0.77062(14))                 |
| Y                    | 6c (0.00000, 0.00000, -0.07931(17))                |
| Al                   | 9e (0.50000, 0.00000, 0.00000)                     |
| B                    | 18g (0.32863(59), 0.00000, 0.00000)                |

**Table S4.** Calculated crystallographic data for  $\text{Mo}_{4/3}\text{Y}_{2/3}\text{AlB}_2$  using the GGA-PBE exchange-correlation functional with Wyckoff positions given for each unique crystallographic site.

| Space group        | Lattice parameter (Å)                                          | Atomic position                    |
|--------------------|----------------------------------------------------------------|------------------------------------|
| $P\bar{6}2m$ (189) | $a = 5.434$<br>$c = 7.644$                                     | Mo 4h (0.33333, 0.66667, 0.69125)  |
|                    |                                                                | Y 2c (0.00000, 0.00000, 0.23686)   |
|                    |                                                                | Al 3f (0.49975, 0.00000, 0.00000)  |
|                    |                                                                | B 3g (0.66787, 0.00000, 0.50000)   |
|                    |                                                                | B 3g (0.36788, 0.00000, 0.50000)   |
| $P\bar{6}2c$ (190) | $a = 5.464$<br>$c = 15.183$                                    | Mo 4f (0.33333, 0.66667, 0.40766)  |
|                    |                                                                | Mo 4e (0.00000, 0.00000, 0.09514)  |
|                    |                                                                | Y 4f (0.33333, 0.66667, 0.63022)   |
|                    |                                                                | Al 6h (0.66728, 0.83376, 0.25000)  |
|                    |                                                                | B 6g (0.66585, 0.00000, 0.00000)   |
|                    |                                                                | B 6g (0.33415, 0.00000, 0.00000)   |
| $R\bar{3}m$ (166)  | $a = 5.465$<br>$c = 22.755$                                    | Mo 6c (0.00000, 0.00000, 0.56355)  |
|                    |                                                                | Mo 6c (0.00000, 0.00000, 0.77221)  |
|                    |                                                                | Y 6c (0.00000, 0.00000, -0.07973)  |
|                    |                                                                | Al 9e (0.50000, 0.00000, 0.00000)  |
|                    |                                                                | B 18g (0.33377, 0.00000, 0.50000)  |
| $C2$ (5)           | $a = 9.473$<br>$b = 5.467$<br>$c = 8.214$<br>$\beta = 112.564$ | Mo 4c (0.27262, 0.33333, 0.81672)  |
|                    |                                                                | Mo 4c (-0.06298, 0.33333, 0.80968) |
|                    |                                                                | Y 4c (0.57996, 0.33335, 0.73957)   |
|                    |                                                                | Al 2b (0.00000, 0.33346, 0.50000)  |
|                    |                                                                | Al 4c (0.75006, 0.08325, 0.50001)  |
|                    |                                                                | B 2a (0.00000, -0.00076, 0.00000)  |
|                    |                                                                | B 4c (0.66712, 0.00025, 0.00000)   |
|                    |                                                                | B 2a (0.00000, 0.66742, 0.00000)   |
|                    |                                                                | B 4c (0.16713, 0.16643, 0.00001)   |

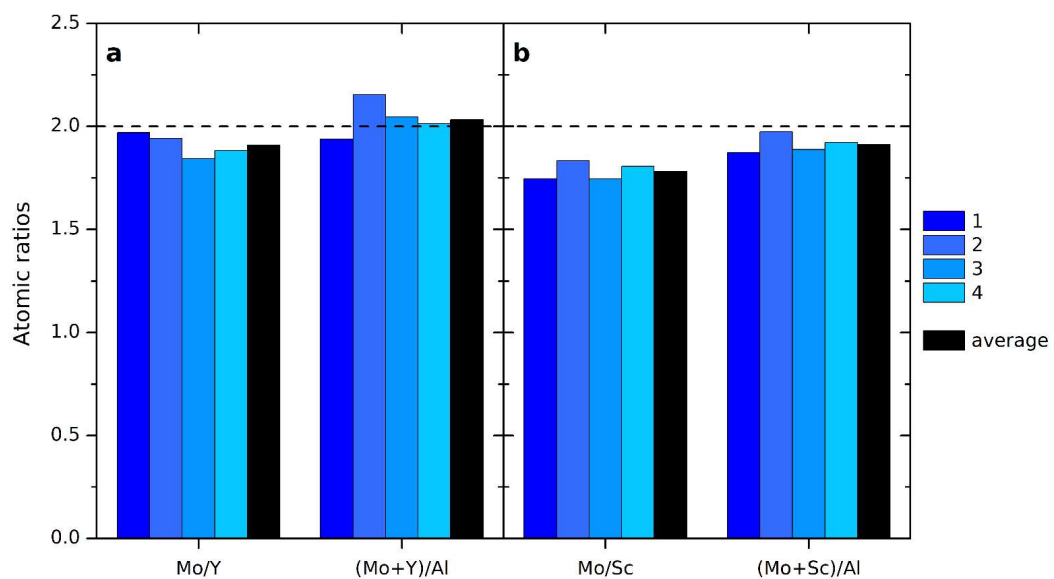

**Figure S13.** Atomic ratios from four individual powder particles along with average values from EDX for (a)  $\text{Mo}_{4/3}\text{Y}_{2/3}\text{AlB}_2$  and (b)  $\text{Mo}_{4/3}\text{Sc}_{2/3}\text{AlB}_2$ .

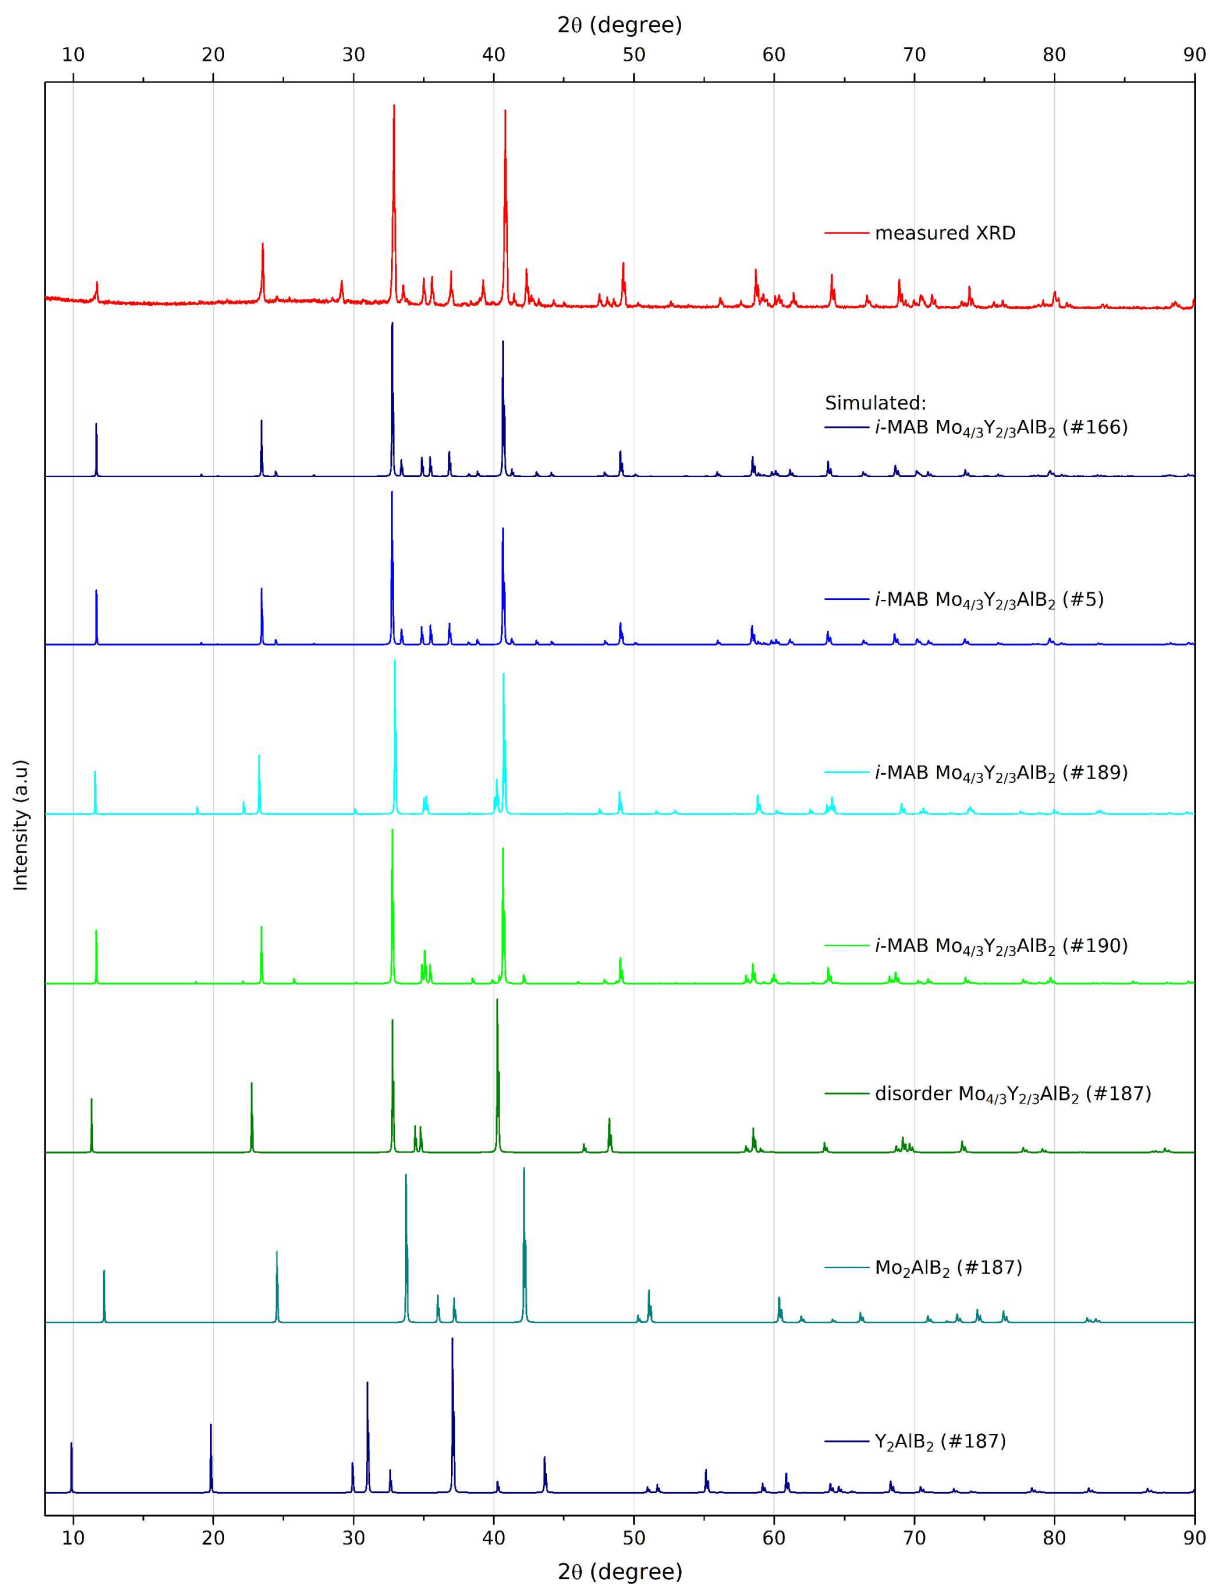

**Figure S14.** Measured XRD of the  $\text{Mo}_{4/3}\text{Y}_{2/3}\text{AlB}_2$  sample along with simulated diffractograms for four *i*-MAB and one disordered  $\text{Mo}_{4/3}\text{Y}_{2/3}\text{AlB}_2$ . In addition, simulated diffractograms for  $\text{Mo}_2\text{AlB}_2$  and  $\text{Y}_2\text{AlB}_2$  with  $P\bar{6}m2$  symmetry is shown.

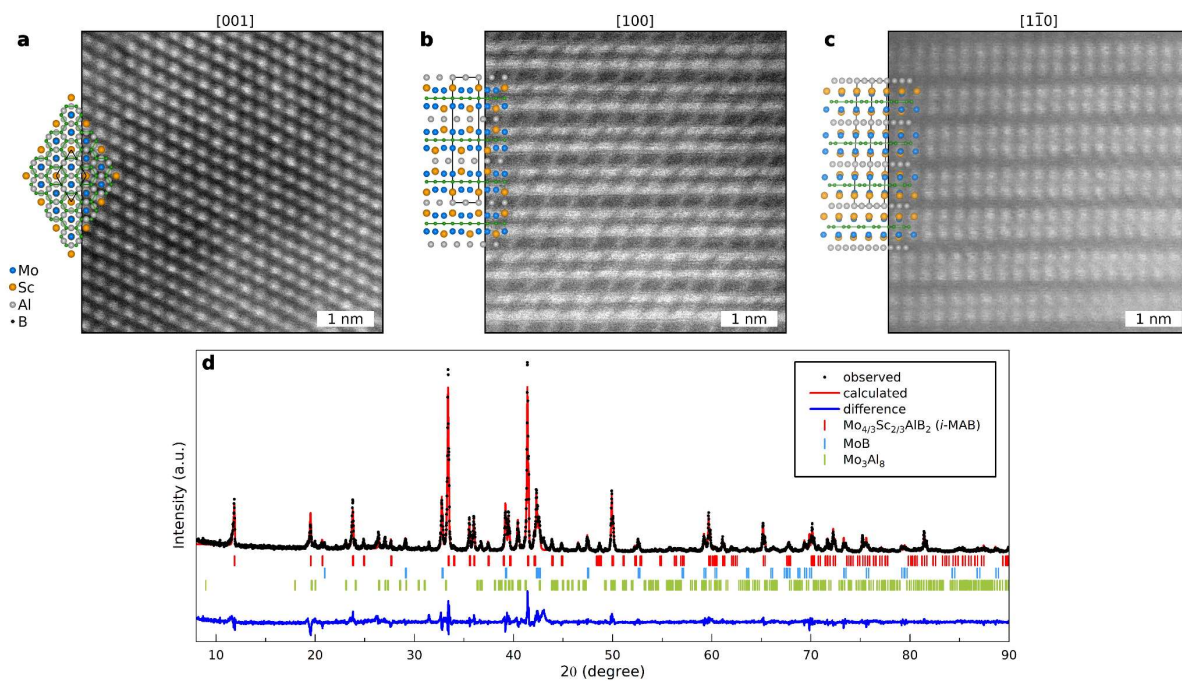

**Figure S15.** Experimental characterization of synthesized  $\text{Mo}_{4/3}\text{Sc}_{2/3}\text{AlB}_2$   $i$ -MAB phase. (a-c) In-plane chemical ordering of the  $i$ -MAB phase is evident from STEM images along the [001], [100] and  $[1\bar{1}0]$  zone axis, respectively. Schematics to the left of each image represent the corresponding atomic arrangements considering the hexagonal  $R\bar{3}m$  (#166) structure. (d) Rietveld refinement of XRD of sample assuming space group  $R\bar{3}m$  (#166).

**Table S5.** Rietveld refinement of  $\text{Mo}_{4/3}\text{Sc}_{2/3}\text{AlB}_2$  assuming a hexagonal  $R\bar{3}m$  (#166) symmetry. From the Rietveld refinement of the XRD pattern shown in Fig. 5a, the mass fractions of the *i*-MAB phase  $\text{Mo}_{4/3}\text{Sc}_{2/3}\text{AlB}_2$ , MoB and  $\text{Mo}_3\text{Al}_8$  were: 62, 20 and 18 wt%, respectively. The total  $\chi^2$  value was 3.76.

| Formula (unit cell)  | $\text{Mo}_{12}\text{Sc}_6\text{Al}_9\text{B}_{18}$ |
|----------------------|-----------------------------------------------------|
| Space group          | $R\bar{3}m$ (#166)                                  |
| $a = b$ (Å)          | 5.36261(8)                                          |
| $c$ (Å)              | 22.44267(42)                                        |
| $\alpha = \beta$ (°) | 90                                                  |
| $\gamma$ (°)         | 120                                                 |
| Mo                   | 6c (0.00000, 0.00000, 0.66543(15))                  |
| Mo                   | 6c (0.00000, 0.00000, 0.76785(15))                  |
| Y                    | 6c (0.00000, 0.00000, -0.08884(34))                 |
| Al                   | 9e (0.50000, 0.00000, 0.00000)                      |
| B                    | 18g (0.37120(400), 0.00000, 0.00000)                |

**Table S6.** Calculated crystallographic data for  $\text{Mo}_{4/3}\text{Sc}_{2/3}\text{AlB}_2$  using the GGA-PBE exchange-correlation functional with Wyckoff positions given for each unique crystallographic site.

| Space group        | Lattice parameter (Å)                                                  | Atomic position                    |
|--------------------|------------------------------------------------------------------------|------------------------------------|
| $P\bar{6}2m$ (189) | $a = 5.35158$<br>$c = 7.51226$                                         | Mo 4h (0.33333, 0.66667, 0.69540)  |
|                    |                                                                        | Sc 2c (0.00000, 0.00000, 0.24794)  |
|                    |                                                                        | Al 3f (0.49978, 0.00000, 0.00000)  |
|                    |                                                                        | B 3g (0.67029, 0.00000, 0.50000)   |
|                    |                                                                        | B 3g (0.32972, 0.00000, 0.50000)   |
|                    |                                                                        |                                    |
| $P\bar{6}2c$ (190) | $a = 5.37974$<br>$c = 14.92960$                                        | Mo 4f (0.33333, 0.66667, 0.40521)  |
|                    |                                                                        | Mo 4e (0.00000, 0.00000, 0.09690)  |
|                    |                                                                        | Sc 4f (0.33333, 0.66667, 0.62474)  |
|                    |                                                                        | Al 6h (0.66692, 0.83284, 0.25000)  |
|                    |                                                                        | B 6g (0.66487, 0.00000, 0.00000)   |
|                    |                                                                        | B 6g (0.33513, 0.00000, 0.00000)   |
|                    |                                                                        |                                    |
| $R\bar{3}m$ (166)  | $a = 5.38270$<br>$c = 22.38392$                                        | Mo 6c (0.00000, 0.00000, 0.56457)  |
|                    |                                                                        | Mo 6c (0.00000, 0.00000, 0.77050)  |
|                    |                                                                        | Sc 6c (0.00000, 0.00000, -0.08331) |
|                    |                                                                        | Al 9e (0.50000, 0.00000, 0.00000)  |
|                    |                                                                        | B 18g (0.33514, 0.00000, 0.50000)  |
|                    |                                                                        |                                    |
| $C2$ (5)           | $a = 9.32832$<br>$b = 5.38336$<br>$c = 8.08154$<br>$\beta = 112.58693$ | Mo 4c (0.27090, 0.33334, 0.81182)  |
|                    |                                                                        | Mo 4c (-0.06397, 0.33334, 0.80649) |
|                    |                                                                        | Sc 4c (0.58345, 0.33336, 0.75038)  |
|                    |                                                                        | Al 2b (0.00000, 0.33549, 0.50000)  |
|                    |                                                                        | Al 4c (0.75111, 0.08219, 0.50000)  |
|                    |                                                                        | B 2a (0.00000, -0.00175, 0.00000)  |
|                    |                                                                        | B 4c (0.66763, 0.00073, 0.00003)   |
|                    |                                                                        | B 2a (0.00000, 0.66847, 0.00000)   |
|                    |                                                                        | B 4c (0.16765, 0.16593, 0.00003)   |
|                    |                                                                        |                                    |

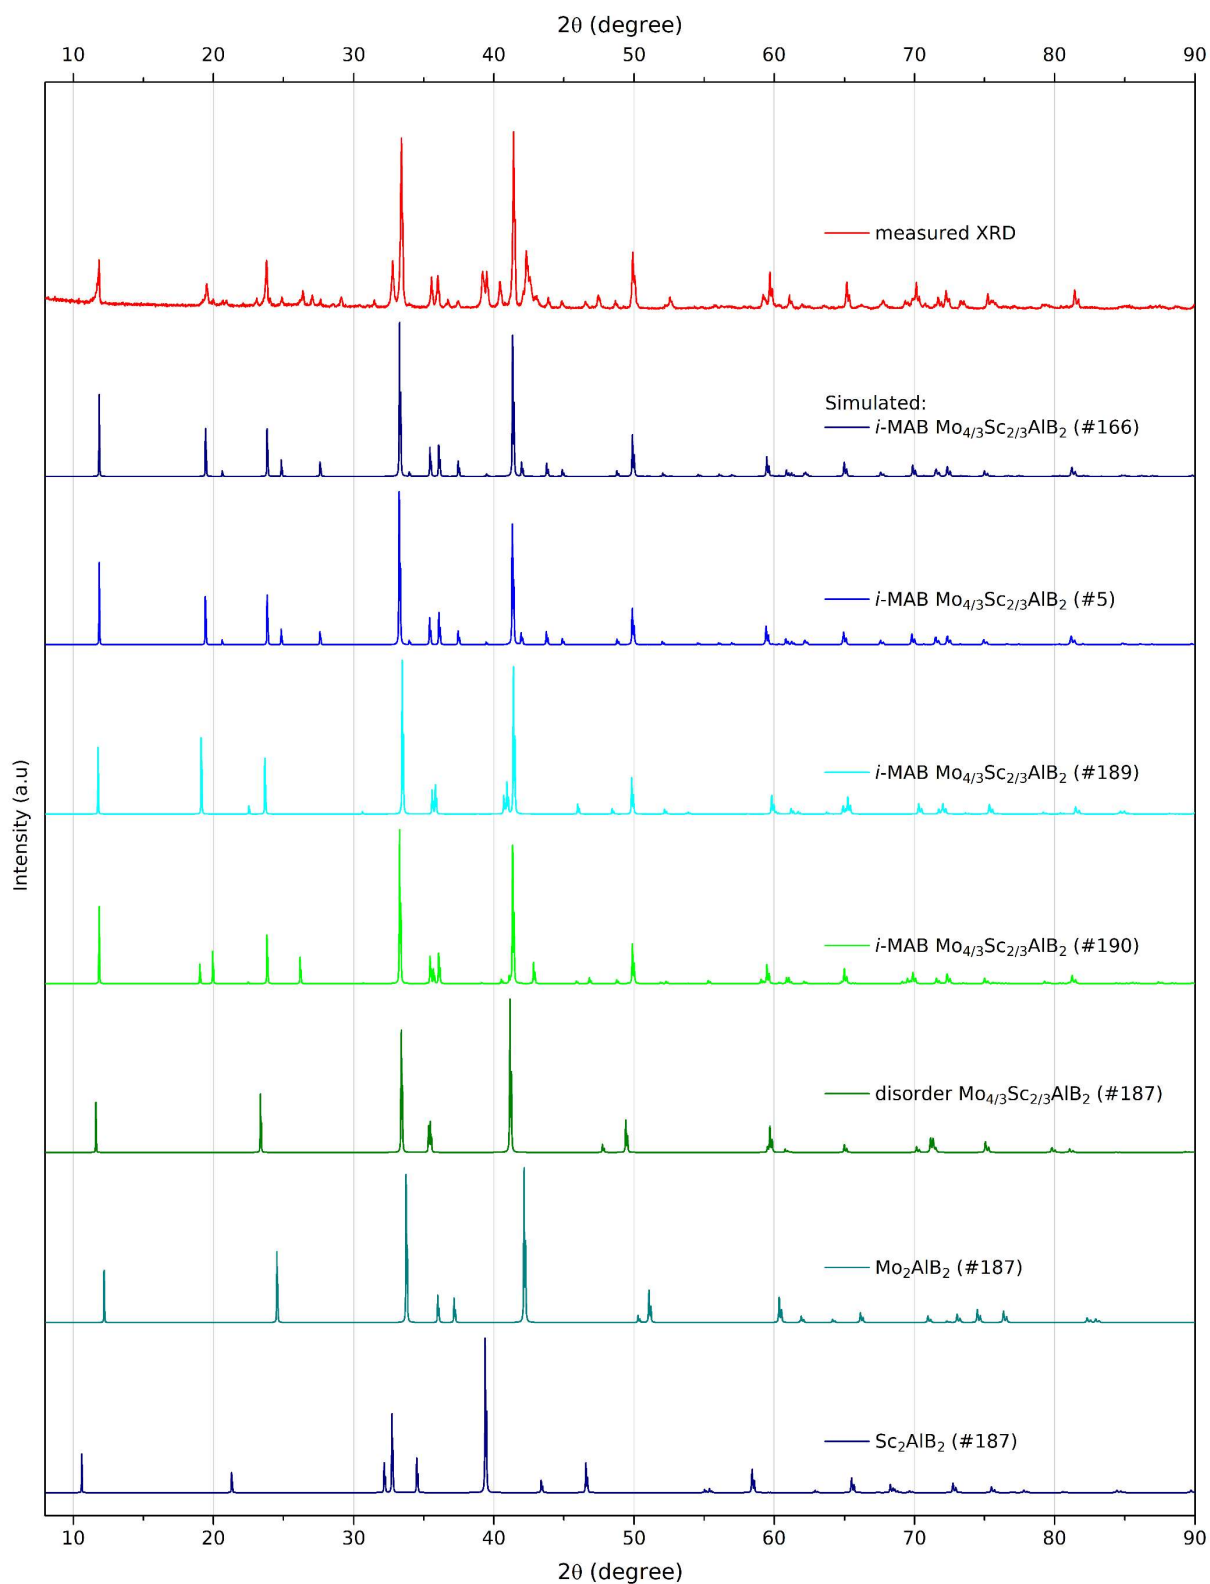

**Figure S16.** Measured XRD of the  $\text{Mo}_{4/3}\text{Sc}_{2/3}\text{AlB}_2$  sample along with simulated diffractograms for four  $i$ -MAB and one disordered  $\text{Mo}_{4/3}\text{Sc}_{2/3}\text{AlB}_2$ . In addition, simulated diffractograms for  $\text{Mo}_2\text{AlB}_2$  and  $\text{Sc}_2\text{AlB}_2$  with  $P\bar{6}m2$  symmetry is shown.



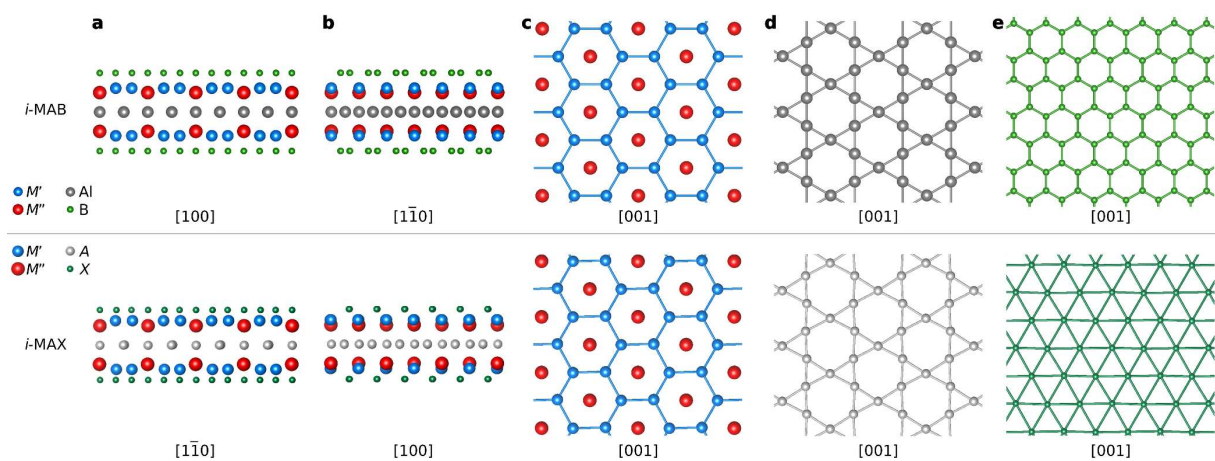

**Figure S17.** Schematic illustration and comparison of *i*-MAB and *i*-MAX phases locally along (a)  $[100]$  and (b)  $[1\bar{1}0]$  zone axes and for (c) *M*-layer, (d) Al- and *A*-layer, and (e) B and *X*-layer along  $[001]$  zone axes.
